16 **Abstract**

17 **Objective:** Identify the most important sociodemographic and behavioral factors related to the  
18 diet of low-income adults with hypertension in order to guide the development of a community  
19 health worker (CHW) healthy eating intervention for low-income populations with hypertension.

20 **Design:** In this cross-sectional analysis, dietary recalls were used to assess Healthy Eating Index-  
21 2020 (HEI-2020) total (range: 0 to 100 [best diet quality]) and component scores and sodium  
22 intake. Self-reported sociodemographic and behavioral data were entered into a Least Absolute  
23 Shrinkage and Selection Operator (LASSO) regression model to determine the relative  
24 importance of factors related to diet quality.

25 **Setting:** Five community health centers in Boston, Massachusetts.

26 **Participants:** Adults (>20 years old) with a hypertension diagnosis.

27 **Results:** Participants (N=291) were mostly female (65.0%), on Medicaid (82.8%), food insecure  
28 (59.5%), and Hispanic (52.2%). The mean (95% CI) HEI-2020 score was 63.0 (62.3, 65.7)  
29 Component scores were low for sodium and whole grains; mean (SE) sodium intake was 2676.9  
30 (45.5) mg/day. The most important factors associated with lower HEI-2020 scores were: not  
31 having own housing, male gender, tobacco use, marijuana use, and skipping meals; the most  
32 important factors associated with higher HEI-2020 scores were Hispanic ethnicity and receipt of  
33 community food resources (5-fold cross-validated  $R^2=0.17$ ).

34 **Conclusions:** In this population of low-income adults with hypertension, diet quality would be  
35 improved by reducing sodium and increasing whole grain intake. Healthy eating interventions  
36 among low-income populations should consider providing dietary guidance in the context of  
37 behavioral factors (e.g., meal skipping) and substance use (e.g., marijuana) and should address  
38 barriers to health eating through referral to community food resources (e.g., food pantries).

## 39 **Introduction**

40 Hypertension, a leading risk factor for cardiovascular disease, affects nearly half of US  
41 adults (1, 2). Healthy dietary patterns (e.g., the dietary approaches to stop hypertension [DASH]  
42 diet) that emphasize reducing sodium and saturated fat intake and adequate potassium-rich fruits  
43 and vegetables and whole grains have been shown to effectively reduce blood pressure (4) and  
44 10-year atherosclerotic cardiovascular disease risk (5). As such, referral to behavioral counseling  
45 interventions that address diet is recommended by the US Preventive Services Task Force  
46 (USPSTF) for patients with hypertension to reduce CVD risk (7).

47 However, low-income individuals may face unique challenges to achieving a healthy diet  
48 such as cost-related issues that prevent them from obtaining nutritious foods, (8) as well as  
49 barriers to food preparation including lack of time, cooking tools and appliances, and adequate  
50 storage (9). Thus, recognizing that existing behavioral interventions may insufficiently address  
51 the context in which dietary decisions are made among under-resourced populations, the  
52 USPSTF specifically calls for more research on behavioral intervention approaches that work in  
53 low-resource settings (7).

54 Community health workers (CHWs) are lay individuals trained and certified in a  
55 particular area of chronic disease management education who are often members of the  
56 communities they serve. The American Heart Association suggests that, embedded in care teams,  
57 CHWs may be able to provide evidence-based nutritional advice in the context of the  
58 sociodemographic, behavioral, and cultural factors that may be barriers to adopting healthier  
59 dietary patterns among low-resourced communities (11) (12).

60 While there are many sociodemographic (e.g., age, gender) and behavioral factors (e.g.,  
61 smoking, distance to grocery stores) that have been linked to diet quality, which of these factors

62 CHWs may need to prioritize is unclear. It is also unclear how to address these factors in a  
63 healthy eating intervention for low-income adults with hypertension.

64 The purpose of this analysis was to 1) describe components of the current dietary pattern  
65 most in need of improvement among low-income adults with hypertension and 2) determine the  
66 most important sociodemographic and behavioral factors associated with their diet quality. The  
67 most important factors related to diet quality in this population will be used to guide the  
68 development and delivery of a CHW healthy eating intervention to improve diet quality for low-  
69 income adults with hypertension.

## 70 **Methods**

71 This is a secondary analysis of the LiveWell observational cohort of community health  
72 center patients. LiveWell was designed to assess, in a natural experiment, the impacts of the  
73 Massachusetts Medicaid Flexible Services program that provides funding to accountable care  
74 organizations (ACOs) to connect patients with food and housing resources (13). LiveWell  
75 participants were recruited from five community health centers in the Boston, Massachusetts  
76 area. To be eligible, participants had to be between ages 21 to 62 years, have had at least two  
77 primary care visits in the previous two years, speak English or Spanish, and have Medicaid or  
78 commercial ACO insurance. This secondary analysis utilized baseline data collected from  
79 December 19, 2019 to December 8, 2020 among LiveWell participants with a hypertension  
80 diagnosis, determined by International Classification of Diseases (ICD)-10 code or by inclusion  
81 of hypertension in the problem list. This study was conducted according to the guidelines laid  
82 down in the Declaration of Helsinki and all procedures involving research study participants  
83 were approved by the Mass General Brigham Institutional Review Board. Written informed  
84 consent was obtained from all subjects/patients.

85           The purpose of this analysis was to explore the relative importance of sociodemographic  
86 and behavioral factors to a dietary pattern that impacts blood pressure control. Therefore, all  
87 relevant factors obtained through survey, dietary recall, and medical record were included in  
88 modeling. For categorical variables with three or more levels, each level was entered into the  
89 model. A total of 72 factors were considered and are described below.

#### 90 Sociodemographic and Behavioral Factors

91           All sociodemographic and behavioral factors were self-reported in a survey.  
92 Demographics included age, gender, race, ethnicity, marital status, household size, number of  
93 children in the home, household income, education, and employment status. Gender, race,  
94 education, marital status, and employment categories were collapsed because of small cell sizes.  
95 Insurance status was determined from the medical record.

96           Food security was assessed using the 10-item US Department of Agriculture Adult Food  
97 Security Survey Module (14). Using the Nutrition Environment Measures Survey on perceived  
98 nutrition environment, (15) participants were coded as having or not having 1) a freezer  
99 (attached or stand-alone), 2) other countertop appliances (e.g., toaster oven), and 3) other key  
100 appliances (i.e., refrigerator, microwave oven, stove, and oven). The average number of foods  
101 reported and whether main meals (i.e., breakfast, lunch, and dinner) were skipped were  
102 ascertained from dietary recalls. Whether the supermarket or another outlet was the primary  
103 shopping location was self-reported.

104           Participants self-reported receipt of food assistance from: 1) friends/family, 2) meals  
105 eaten at community organizations (e.g., soup kitchen), 3) meals delivered to the home (e.g.,  
106 Meals on Wheels), 4) food from a community organization (e.g., food pantry), 5) supermarket

107 gift cards, 6) Supplemental Nutrition Assistance Program, or 7) other programs (e.g., food from  
108 health clinic, Special Supplemental Nutrition Program for Women, Infants, and Children [WIC]).

109 Participants were considered to have housing instability if they answered yes to at least  
110 one question on a 3-item scale including not renting or owning a house or apartment, moving  
111 two or more times in the past twelve months, and worrying about not having housing in the next  
112 two months. Each housing instability item was also included individually in the model as a  
113 binary factor. Participants were categorized as having living site problems if they endorsed any  
114 of nine household problems (e.g., presence of pests). Participants were considered to have  
115 received transportation assistance if they endorsed receiving any of six types of assistance (e.g.,  
116 reduced public transportation fares) and housing assistance if they endorsed receiving any of  
117 seven types of assistance (e.g., housing vouchers). Participants were considered to have received  
118 help obtaining food, housing, or transportation assistance if they endorsed help from any of six  
119 types of individuals (e.g., social worker).

120 Anxiety symptoms were assessed using the 7-item version of the General Anxiety  
121 Disorders Questionnaire (16). Perceived stress was measured with the 10-item Perceived Stress  
122 Scale (17). Depression symptoms were measured with the 8-item Patient Health Questionnaire  
123 (18). Financial stress was measured using a 5-item subscale from the Weekly Stress Inventory  
124 (19). Items adapted from the National Health Interview Survey were used to assess the delay of  
125 medical care due to financial reasons and cost-related medication underuse (20). The 8-item  
126 modified Medical Outcomes Study Social Support Survey (21) measured  
127 emotional/informational, tangible, affectionate, and positive social interaction support.  
128 Participants additionally self-reported how often they felt lonely or isolated from those around  
129 them on a 5-point Likert scale. Participants' experience with discrimination was self-reported

130 with the validated Everyday Discrimination Scale (Short Version) (22). These measures were  
131 input as continuous variables.

132 Participants self-reported having difficulty with everyday functions because of vision,  
133 cognition, mobility, self-care (i.e., dressing or bathing), and independent living (i.e., running  
134 errands) impairments using wording from the Behavioral Risk Factor Surveillance System (23).  
135 Weekly minutes spent sitting, walking, and engaging in moderate and vigorous physical activity  
136 were measured using the International Physical Activity Questionnaire short form (24). Sleep  
137 quality was measured using the Patient-Reported Outcomes Measurement Information System  
138 (PROMIS) Sleep Disturbance short form 4a (25). Participants self-reported daily cigarette use,  
139 binge drinking, cannabis/marijuana use, and prescription drug use for nonmedical reasons/illegal  
140 drug use.

#### 141 Blood Pressure

142 In this analysis, we used information extracted from the electronic health record in the  
143 Enterprise Data Warehouse to categorize blood pressure control, expanding upon the work from  
144 our previous publication (26) where uncontrolled blood pressure was determined via research  
145 patient data registry records only. Hypertension was considered uncontrolled if mean systolic  
146 blood pressure  $\geq 140$  mm Hg or mean diastolic blood pressure  $\geq 90$  mm Hg in the 12 months  
147 prior to baseline. Participants with no blood pressure recorded in the previous 12 months were  
148 considered to have unknown hypertension status.

#### 149 Dietary Assessment

150 Two dietary recalls were collected at baseline using the National Cancer Institute  
151 Automated Self-Administered 24-Hour Recall System (ASA24-2020), (27) which has shown

152 acceptable accuracy (28) compared to other dietary assessment methods. Dietary recalls were  
153 used to estimate sodium intake, potassium intake, and diet quality.

154 The Healthy Eating Index-2020 (HEI-2020) (29, 30) is a valid and reliable measure of  
155 overall diet quality aligned with the Dietary Guidelines for Americans. The HEI-2020 total score  
156 is a summation of 9 adequacy (i.e., total fruit, whole fruit, total vegetables, beans and greens,  
157 total protein, seafood and plant protein, whole grains, dairy, and fatty acid ratio) and 4  
158 moderation (i.e., saturated fat, added sugar, sodium, refined grains) subcomponent scores. The  
159 minimum score for all subcomponents is 0, representing the worst intake for that component.  
160 Subcomponents scores are based on intake to calories for all components except for the “Fatty  
161 Acid Ratio” score, which is based on the ratio of unsaturated fatty acids to saturated fatty acids  
162 and “Added Sugars” and “Saturated Fats” scores which are based on percent of energy intake.  
163 The total HEI-2020 score ranges from 0 to 100 with 100 indicating the best possible diet quality  
164 through maximization of all subcomponents scores.

#### 165 Analysis Plan

166 HEI-2020 total and component scores were calculated using the population ratio method  
167 (31). Bootstrap resampling was utilized to estimate 95% confidence intervals (CIs). Radar plots  
168 were used to visualize HEI-2020 scores for patients with hypertension.

169 The National Cancer Institute’s Simulating Intake of Micronutrients for Policy Learning  
170 and Engagement (SIMPLE) macro was used to describe the mean and distribution of sodium and  
171 potassium intake from dietary recalls (32). A detailed explanation of the use of this macro along  
172 with information on the availability of SAS code is available elsewhere (32). Estimates were  
173 adjusted for language of administration (i.e., English or Spanish), mode of administration (i.e.,  
174 staff-administered by phone vs. self-administered online), whether recalls were consecutive, a



175 weekend/weekday indicator, and participant rating of whether the recall represented usual intake.  
176 An intake level of 1500 mg/day, the ideal limit for sodium endorsed by the American Heart  
177 Association (AHA), was used (33). The percent whose intake is above the AHA level represents  
178 the proportion who could benefit from reducing sodium intake. There is no estimated average  
179 requirement (EAR) value for potassium intake; therefore, we examined the proportion above  
180 sex-specific adequate intake (AI) values of 2400 and 2600 mg/day for women and men,  
181 respectively (34). The percent above this cut point is likely to consume adequate potassium as it  
182 represents the proportion with intake above that of apparently healthy individuals. Analyses were  
183 performed using Statistical Analysis Systems statistical software package version 9.4 (SAS  
184 Institute, Cary, NC, USA).

185 To identify factors related to diet quality, the simple scoring algorithm was used to  
186 calculate individual level estimates of HEI-2020 total scores (31). Single imputation was used for  
187 missing values of factors using *PROC MI*. Most factors had less than 10 observations missing.  
188 More than 10 observations were missing for having a freezer, having other kitchen appliances,  
189 and for physical activity; however, missingness was less than 20% for these factors.

190 Least absolute shrinkage and selection operator (LASSO) regression was used to identify  
191 the most important factors related to HEI-2020 total scores. Factors were standardized such that  
192 the absolute value of the coefficients could be used to determine importance. K-fold (k=5) cross  
193 validation was used to select the best model. In sensitivity analyses, elastic net with  $\alpha=0.5$  and 5-  
194 fold cross validation was also used. Analyses were performed in R using package *glmnet* (35). In  
195 exploratory analyses, HEI-2020 total and component scores and radar plots were also assessed  
196 for the top four factors identified in the LASSO model.

## 197 **Results**

198 The sample (N=291) was mostly female (65.0%) with a median (p25, p75) age of 54.0  
 199 (47.0, 58.0) years (Table 1). Over half of participants were food insecure (59.5%), identified as  
 200 Hispanic (52.2%), and had Medicaid insurance (82.8%). Most participants' blood pressure was  
 201 controlled (76.6%), with mean blood pressure less than 140/90 mmHg.

202 **Table 1: Characteristics of a sample of low-income community health center patients with**  
 203 **health insurance and a hypertension diagnosis (N=291)**

|                                                                    |                                             | Median (p25, p75)/ N (%) |
|--------------------------------------------------------------------|---------------------------------------------|--------------------------|
| Age                                                                |                                             | 54.0 (47.0, 58.0)        |
| Female sex                                                         |                                             | 189 (65.0%)              |
| Ethnicity                                                          |                                             | 152 (52.2%)              |
| Race                                                               | White, only                                 | 141 (48.5%)              |
|                                                                    | Black, only                                 | 54 (18.6%)               |
|                                                                    | Other races, only*                          | 62 (21.3%)               |
|                                                                    | More than One Race                          | 34 (11.7%)               |
| Insurance, Medicaid                                                |                                             | 241 (82.8%)              |
| Married/Living with Significant Other                              |                                             | 109 (37.5%)              |
| Employment                                                         | Full-time                                   | 57 (19.6%)               |
|                                                                    | Part-time <sup>†</sup>                      | 51 (17.5%)               |
|                                                                    | Homemaker/work in the home                  | 30 (10.3%)               |
|                                                                    | Not employed, Looking for work <sup>§</sup> | 35 (12.0%)               |
|                                                                    | Not employed, Not looking for work          | 34 (11.7%)               |
|                                                                    | Disabled and unable to work                 | 84 (28.9%)               |
| Education                                                          | Less than high school                       | 66 (22.7%)               |
|                                                                    | High School                                 | 87 (29.9%)               |
|                                                                    | Some College                                | 84 (28.9%)               |
|                                                                    | College or more                             | 54 (18.6%)               |
| US Department of Agriculture Food Security raw score <sup>  </sup> |                                             | 3.0 (1.0, 7.0)           |
| Housing Security                                                   |                                             | 120 (41.2%)              |
| Insurance Type, Medicaid                                           |                                             | 241 (82.8%)              |
| Household income <\$30k                                            |                                             | 206 (70.8%)              |
| Supplemental nutrition assistance program (SNAP)                   |                                             | 175 (60.1%)              |
| Current smoking                                                    |                                             | 83 (28.5%)               |
| Hypertension status <sup>¶</sup>                                   |                                             |                          |
| Controlled                                                         |                                             | 223 (76.6%)              |
| Uncontrolled                                                       |                                             | 47 (16.2%)               |
| Unknown control                                                    |                                             | 21 (7.2%)                |

204 \*Other race includes Asian only, Native Hawaiian/Pacific Islander only, Native American/Native  
 205 Alaskan only, and Other race only.

206 <sup>†</sup>Includes one student who also works part-time.

207 <sup>§</sup>Includes those who are retired.

208 ¶High food security: Raw score 0; Marginal food security: Raw score 1-2; Low food security:  
209 Raw score: 3-5; Very low food security Raw score 6-10

210 ¶Participants in the unknown HTN control group had 0 day with a BP measurement in the year  
211 before enrollment. If 2 or more BP readings in 1 day, only the lowest BP was included.

212  
213           The mean (95% CI) HEI-2020 total score was 63.0 (62.3, 65.7) points (Table 2 and  
214 Supplemental Figure 1). Total protein, seafood and plant protein, whole fruit, and greens and  
215 beans were the subcomponents with the highest scores. Sodium and whole grains were the  
216 subcomponents with the lowest scores. The mean (SE) sodium intake was 2676.9 (45.5) mg, and  
217 based on this result, approximately 86.6% (1.6%) would be estimated to have excessive sodium  
218 intake above 1500 mg/day. The mean (SE) potassium intake of female and male participants  
219 with hypertension was 2137.8 (31.8) and 2177 (35.2) mg, indicating that 32.5% (1.6%) and  
220 26.1% (1.6%) would be estimated to consume adequate potassium, respectively.

221 **Table 2: Healthy Eating Index-2020 Total and Subcomponent Scores and Bootstrapped 95% Confidence Intervals**

|                           | Max Score | Total Sample (N=291) | Does Not Have Own Housing (N=42) | Has Own Housing (N=244) | Female (N=189)       | Male (N=102)         | Hispanic (N=152)     | Non-Hispanic (N=139) | Smoking (N=81)       | Non-Smoking (N=207)  |
|---------------------------|-----------|----------------------|----------------------------------|-------------------------|----------------------|----------------------|----------------------|----------------------|----------------------|----------------------|
| Total Score               | 100       | 63.0<br>(62.3, 65.7) | 53.2<br>(47.0, 59.1)             | 65.5<br>(62.7, 67.7)    | 67.5<br>(65.1, 69.9) | 58.6<br>(53.5, 62.2) | 67.5<br>(65.0, 70.0) | 58.5<br>(54.7, 61.9) | 55.9<br>(50.0, 60.3) | 66.2<br>(63.7, 68.3) |
| Adequacy Components       |           |                      |                                  |                         |                      |                      |                      |                      |                      |                      |
| Total Vegetables          | 5         | 4.1<br>(4.2, 4.8)    | 3.7<br>(3.1, 4.6)                | 4.6<br>(4.2, 5.0)       | 4.9<br>(4.4, 5.0)    | 3.9<br>(3.4, 4.3)    | 5.0<br>(4.9, 5.0)    | 3.7<br>(3.2, 4.1)    | 3.7<br>(3.2, 4.3)    | 4.8<br>(4.2, 5.0)    |
| Greens and Beans          | 5         | 5.0<br>(4.8, 5.0)    | 3.5<br>(1.8, 5.0)                | 5.0<br>(4.9, 5.0)       | 5.0<br>(5.0, 5.0)    | 4.5<br>(3.4, 5.0)    | 5.0<br>(5.0, 5.0)    | 3.9<br>(3.0, 5.0)    | 3.9<br>(2.5, 5.0)    | 5.0<br>(5.0, 5.0)    |
| Total Fruit               | 5         | 3.5<br>(3.3, 4.1)    | 2.7<br>(1.7, 3.8)                | 3.7<br>(3.2, 4.3)       | 4.1<br>(3.5, 4.9)    | 3.0<br>(2.4, 3.8)    | 4.6<br>(3.9, 5.0)    | 2.8<br>(2.2, 3.3)    | 2.4<br>(1.7, 3.1)    | 4.1<br>(3.6, 4.7)    |
| Whole Fruit               | 5         | 4.8<br>(4.2, 5.0)    | 3.1<br>(1.9, 4.4)                | 5.0<br>(4.2, 5.0)       | 5.0<br>(4.7, 5.0)    | 3.7<br>(2.6, 4.9)    | 5.0<br>(5.0, 5.0)    | 3.6<br>(2.7, 4.5)    | 2.7<br>(1.6, 4.0)    | 5.0<br>(4.8, 5.0)    |
| Whole Grains              | 10        | 2.8<br>(2.4, 3.2)    | 1.5<br>(0.8, 2.3)                | 3.0<br>(2.6, 3.5)       | 3.2<br>(2.7, 3.8)    | 2.3<br>(1.7, 3.1)    | 2.7<br>(2.0, 3.2)    | 2.9<br>(2.3, 3.5)    | 2.5<br>(1.9, 3.3)    | 3.0<br>(2.5, 3.5)    |
| Dairy                     | 10        | 5.8<br>(5.8, 6.8)    | 6.5<br>(5.2, 8.2)                | 6.1<br>(5.5, 6.8)       | 5.9<br>(5.1, 6.7)    | 6.7<br>(6.0, 7.6)    | 5.5<br>(4.8, 6.4)    | 6.9<br>(6.2, 7.6)    | 6.6<br>(5.5, 7.7)    | 6.2<br>(5.6, 6.8)    |
| Total Protein Food        | 5         | 5.0<br>(5.0, 5.0)    | 5.0<br>(5.0, 5.0)                | 5.0<br>(5.0, 5.0)       | 5.0<br>(5.0, 5.0)    | 5.0<br>(5.0, 5.0)    | 5.0<br>(5.0, 5.0)    | 5.0<br>(5.0, 5.0)    | 5.0<br>(5.0, 5.0)    | 5.0<br>(5.0, 5.0)    |
| Seafood and Plant Protein | 5         | 5.0<br>(5.0, 5.0)    | 4.8<br>(2.8, 5.0)                | 5.0<br>(5.0, 5.0)       | 5.0<br>(5.0, 5.0)    | 5.0<br>(4.0, 5.0)    | 5.0<br>(5.0, 5.0)    | 4.9<br>(4.0, 5.0)    | 5.0<br>(4.1, 5.0)    | 5.0<br>(5.0, 5.0)    |
| Fatty Acid Ratio          | 10        | 4.6<br>(4.1, 5.1)    | 4.2<br>(3.0, 5.2)                | 4.7<br>(4.1, 5.4)       | 5.0<br>(4.3, 6.1)    | 4.2<br>(3.4, 5.0)    | 5.2<br>(4.3, 6.1)    | 4.1<br>(3.5, 4.8)    | 3.8<br>(2.9, 4.7)    | 4.9<br>(4.3, 5.7)    |
| Moderation Components     |           |                      |                                  |                         |                      |                      |                      |                      |                      |                      |

|                   |    |                   |                   |                   |                   |                   |                   |                   |                   |                   |
|-------------------|----|-------------------|-------------------|-------------------|-------------------|-------------------|-------------------|-------------------|-------------------|-------------------|
| Sodium            | 10 | 2.2<br>(1.4, 2.5) | 0.0<br>(0.0, 1.8) | 2.3<br>(1.6, 3.1) | 2.5<br>(1.8, 3.3) | 1.2<br>(0.1, 2.2) | 1.8<br>(0.9, 2.8) | 2.1<br>(1.2, 3.0) | 2.3<br>(1.3, 3.2) | 1.9<br>(1.1, 2.6) |
| Refined<br>Grains | 10 | 6.6<br>(6.1, 7.2) | 5.2<br>(3.7, 6.8) | 7.0<br>(6.4, 7.6) | 7.4<br>(6.8, 8.0) | 5.8<br>(4.7, 6.7) | 6.9<br>(6.1, 7.8) | 6.5<br>(5.7, 7.2) | 6.4<br>(5.3, 7.6) | 6.8<br>(6.0, 7.4) |
| Saturated<br>Fat  | 10 | 5.7<br>(5.3, 6.3) | 5.1<br>(3.9, 6.3) | 5.9<br>(5.3, 6.5) | 6.4<br>(5.8, 7.1) | 4.9<br>(4.0, 5.9) | 6.7<br>(6.0, 7.5) | 4.9<br>(4.2, 5.7) | 4.6<br>(3.4, 5.6) | 6.2<br>(5.5, 6.8) |
| Added<br>Sugar    | 10 | 7.9<br>(7.6, 8.4) | 7.8<br>(6.6, 8.9) | 8.1<br>(7.5, 8.7) | 8.0<br>(7.3, 8.6) | 8.4<br>(7.3, 9.2) | 9.1<br>(8.3, 9.8) | 7.2<br>(6.6, 7.9) | 7.2<br>(6.2, 8.1) | 8.4<br>(7.7, 9.0) |

222 Note: The minimum score for all subcomponents is 0. Subcomponent scores are based off intake to calories for all components except  
223 for the “Fatty Acid Ratio” score which is based off the ratio of unsaturated fatty acids to saturated fatty acids and “Added Sugars” and  
224 “Saturated Fats” scores which are based on percent of energy intake

225 In order of importance, LASSO regression identified the top factors related to HEI-2020  
226 total scores (Figure 1). The factors associated with lower diet quality were not having own  
227 housing, male gender, tobacco use, marijuana use, and skipping meals, and the factors associated  
228 with higher diet quality were Hispanic ethnicity and receipt of community food resources (e.g.,  
229 eating meals at a community organization and receiving a supermarket gift card). The cross-  
230 validated  $R^2$  was 0.17. A sensitivity analysis using elastic net ranked factors similarly with a  
231 cross-validated  $R^2$  of 0.18 (Supplemental Figure 2).

### 232 **Figure 1: Factors Related to HEI-2020 Scores Identified by LASSO**

233  
234 Figure Note: GAD, General Anxiety Disorders Questionnaire; PHQ, Patient Health  
235 Questionnaire; PROMIS, Patient-Reported Outcomes Measurement Information System. Factors  
236 are ranked from top to bottom in order of importance based on the absolute value of the model  
237 coefficients. A positive coefficient means that the reference value is associated with better diet  
238 quality. A negative coefficient means that the reference value is associated with worse diet  
239 quality.

240  
241 In exploratory analyses of the top four factors associated with diet quality, the mean  
242 (95% CI) HEI-2020 total scores of individuals who do not have their own housing (53.2 [47.0,  
243 59.1]), non-Hispanic participants (58.5 [54.7, 61.9]), men (58.6 [53.5, 62.2]), and individuals  
244 who smoke (55.9 [50.0, 60.3]) were about 10 points lower compared to those with their own  
245 housing (65.5 [62.7, 67.7]), Hispanic participants (67.5 [65.0, 70.0]), women (67.5 [65.1, 69.9]),  
246 and non-smokers (66.2 [63.7, 68.3]), respectively. (Table 2 and Supplemental Figure 3).

### 247 **Discussion**

248 This study of low-income community health center patients with hypertension  
249 demonstrated that overall diet quality was not aligned with dietary guidelines (36). Similar to the  
250 overall U.S. population, (37) the consumption of sodium was high and the consumption of whole  
251 grains was low given caloric intake. Furthermore, the results also suggested that over half of  
252 patients could benefit from increasing potassium consumption. Lower sodium intake and higher

253 potassium intake have been associated with lower risk of cardiovascular disease (38). To address  
254 diet quality in this at-risk population, the adoption of multiple dietary patterns such as DASH,  
255 the Mediterranean diet, or a vegetarian diet may be recommended in line with personal and  
256 cultural preferences (39, 40). However, adoption and adherence to these dietary patterns can be  
257 difficult, especially among low-resourced groups. This analysis identified important  
258 sociodemographic and behavioral factors associated with diet among community health center  
259 patients with hypertension that can guide the development of a CHW healthy eating intervention.

260         Results suggest that gender and ethnicity were among the most important factors related  
261 to diet quality. While women and Hispanic individuals had diet quality scores about 10 points  
262 higher than their counterparts, all subgroups had overall diet quality below the score of 74 that  
263 would meet Healthy People 2020 goals (41). Interventions to address diet may need to consider  
264 tailoring advice and support to account for differences by gender and culture. Through  
265 conversation with stakeholders (i.e., patients and CHWs), we will explore how to address these  
266 factors in our intervention (e.g., involving female partners in the intervention).

267         In the current study, housing situation was the top factor related to diet quality. Prior  
268 research has demonstrated that unstable housing is associated with poor cardiometabolic health  
269 (43). Therefore, programs that support finding housing and applying for rental assistance  
270 programs for those in need would enhance efforts to improve diet and hypertension. Similarly,  
271 connecting patients with community-based nutrition services may help improve the diet of  
272 individuals with hypertension as our model suggested that receiving support for food acquisition  
273 (i.e., meals at a community organization and receiving a supermarket gift card) was positively  
274 associated with diet quality in this mostly low-income population. The role of CHWs includes  
275 assessment of social needs and connection with social services, advocacy, and support (44). This

276 uniquely situates them to being able to address housing and food barriers. Our intervention may  
277 thus include referral to community resources.

278 Our study identified that the use of cigarettes and marijuana was associated with lower  
279 diet quality. In the US population, smoking has been associated with lower diet quality (45) and  
280 quitting smoking may be associated with improvement in diet and other health metrics (e.g.,  
281 mental health) (46). Concerns around weight gain with quitting smoking may need to be  
282 addressed especially among those with poor diet (47). Research has also demonstrated that  
283 cannabis users have lower diet quality compared to never users (48); however, the reasons for  
284 this lower diet quality are unclear. Awareness of substance use patterns could help contextualize  
285 dietary guidance provided by a CHW and provide an opportunity for discussing the relationship  
286 of the substance, such as tobacco or alcohol use, with hypertension.

287 The current study also demonstrated that skipping meals was associated with lower diet  
288 quality. The effect of meal skipping is complex with one analysis of the National Health and  
289 Nutrition Examination Survey data suggesting that meal skipping is generally associated with  
290 lower daily caloric intake and lower diet quality, but also improvements in the consumption of  
291 certain dietary components (e.g., reduced sodium intake when skipping lunch or dinner) (49).  
292 Understanding an individual's reasons for meal skipping would be important for providing  
293 effective dietary advice for individuals with hypertension. For example, a CHW could address  
294 reasons such as unaffordability of healthy food or not having time to prepare meals with  
295 strategies like grocery budgeting and meal planning.

### 296 Strengths and Limitations

297 A strength of this analysis is the use of estimation methods that account for the  
298 substantial within-person variability in dietary intake to leverage dietary recalls for estimating



299 usual dietary intake. This formative research identifies important sociodemographic and  
300 behavioral factors related to diet quality that will complement future stakeholder interviews to  
301 provide a more in-depth understanding of these facilitators and barriers to adopting a healthier  
302 dietary pattern. This will ultimately inform the development and delivery of a CHW-led dietary  
303 intervention for low-income adults with hypertension.

304 A limitation is that difficulties using the ASA-24 search function to find foods and  
305 uncertainty as to how to proceed through the recall have been reported among low-income  
306 individuals which may reduce the accuracy of dietary measures (50). However, participants in  
307 this study were given the option to complete recalls with study staff by phone, if desired.  
308 Additionally, factors identified in the LASSO analysis may not be causally related to HEI-2020  
309 total scores; therefore, additional research is needed to understand associations between  
310 identified factors and diet quality. Finally, this was a relatively small sample of patients from one  
311 urban health system in the northeast US, and results may not be generalizable to patients from  
312 rural areas or from other regions within the US or outside the US.

### 313 Conclusion

314 Among low-income adults with hypertension, sociodemographic and behavioral factors  
315 were associated with diet quality. Participants had high intake of sodium, low intake of  
316 potassium, and low intake of whole grains in the context of their caloric intake. Social factors,  
317 such as housing and community-based nutrition assistance, and behavioral factors, such as meal  
318 skipping, were important factors associated with diet quality. These results support AHA  
319 recommendations for using community health workers as part of team-based care to improve  
320 implementation of blood pressure control strategies, with a particular focus on lifestyle  
321 modification (12). In the future, CHWs could be trained to provide evidence-based dietary

322 advice to improve blood pressure management and reduce cardiovascular risk in the context of  
323 specific sociodemographic and behavioral barriers and facilitators of diet quality in low-income  
324 populations.

325 **Acknowledgements:** None

326

327 **Supporting Information Captions**

328 Supplemental Figure 1: Healthy Eating Index-2020 Total Score among Patients with  
329 Hypertension

330

331 Note: Scores touching the outer ring represent the maximum score for a subcomponent (100% of  
332 the maximum score). A perfect diet quality score of 100 would be represented by touching the  
333 outer ring for all subcomponents.

334

335 Supplemental Figure 2: Factors Related to Healthy Eating Index-2020 Scores Identified by  
336 Elastic Net

337

338 Note: GAD, General Anxiety Disorders Questionnaire; PHQ, Patient Health Questionnaire;  
339 PROMIS, Patient-Reported Outcomes Measurement Information System Sleep Disturbance  
340 Questionnaire. Factors are ranked from top to bottom in order of importance based on the  
341 absolute value of the model coefficients. A positive coefficient means that the reference value is  
342 associated with better diet quality. A negative coefficient means that the reference value is  
343 associated with worse diet quality.

344

345 Supplemental Figure 3: Healthy Eating Index-2020 Total Scores among Patients with  
346 Hypertension by Select Factors

347

348 Note: A=HEI-2020 Total Scores by Housing Situation; B= HEI-2020 Total Scores by Ethnicity;  
349 C= HEI-2020 Total Scores by Gender; D= HEI-2020 Total Scores by Smoking; Total Scores by  
350 ethnicity. Scores touching the outer ring represent the maximum score for a subcomponent  
351 (100% of the maximum score). A perfect diet quality score of 100 would be represented by  
352 touching the outer ring for all subcomponents.

353

354 **References**

- 355 1. Tsao CW, Aday AW, Almarzooq ZI, Alonso A, Beaton AZ, Bittencourt MS, et al. Heart  
356 Disease and Stroke Statistics-2022 Update: A Report From the American Heart Association.  
357 *Circulation*. 2022;145(8):e153-e639.
- 358 2. Stierman B, Afful J, Carroll M, Chen T, Davy O, Fink S, et al. National Health and  
359 Nutrition Examination Survey 2017–March 2020 prepandemic data files—Development of  
360 files and prevalence estimates for selected health outcomes. *National Health Statistics*  
361 *Reports*; no 158. Hyattsville, MD: National Center for Health Statistics; 2021.
- 362 3. Aaron KJ, Sanders PW. Role of dietary salt and potassium intake in cardiovascular health  
363 and disease: a review of the evidence. *Mayo Clin Proc*. 2013;88(9):987-95.
- 364 4. Appel LJ, Moore TJ, Obarzanek E, Vollmer WM, Svetkey LP, Sacks FM, et al. A clinical  
365 trial of the effects of dietary patterns on blood pressure. DASH Collaborative Research  
366 Group. *N Engl J Med*. 1997;336(16):1117-24.
- 367 5. Jeong SY, Wee CC, Kovell LC, Plante TB, Miller ER, 3rd, Appel LJ, et al. Effects of  
368 Diet on 10-Year Atherosclerotic Cardiovascular Disease Risk (from the DASH Trial). *Am J*  
369 *Cardiol*. 2023;187:10-7.
- 370 6. Kim H, Andrade FC. Diagnostic status of hypertension on the adherence to the Dietary  
371 Approaches to Stop Hypertension (DASH) diet. *Prev Med Rep*. 2016;4:525-31.
- 372 7. Krist AH, Davidson KW, Mangione CM, Barry MJ, Cabana M, Caughey AB, et al.  
373 Behavioral Counseling Interventions to Promote a Healthy Diet and Physical Activity for  
374 Cardiovascular Disease Prevention in Adults With Cardiovascular Risk Factors: US  
375 Preventive Services Task Force Recommendation Statement. *Jama*. 2020;324(20):2069-75.

- 376 8. Gregory C, Mancino L, Coleman-Jensen A. Food Security and Food Purchase Quality  
377 Among Low-Income Households: Findings From the National Household Food Acquisition  
378 and Purchase Survey (FoodAPS). In: U.S. Department of Agriculture ERS, editor. 2019.
- 379 9. Thorndike AN, Gardner CD, Kendrick KB, Seligman HK, Yaroch AL, Gomes AV, et al.  
380 Strengthening US Food Policies and Programs to Promote Equity in Nutrition Security: A  
381 Policy Statement From the American Heart Association. *Circulation*. 2022;145(24):e1077-  
382 e93.
- 383 10. Dash S, Delibasic V, Alsaeed S, Ward M, Jefferson K, Manca DP, et al. Knowledge,  
384 Attitudes and Behaviours Related to Physician-Delivered Dietary Advice for Patients with  
385 Hypertension. *J Community Health*. 2020;45(5):1067-72.
- 386 11. Role of Community Health Workers: National Heart, Lung and Blood Institute, National  
387 Institutes of Health; [updated June 2014; cited 2023 July 28, 2023]. Available from:  
388 [https://www.nhlbi.nih.gov/health/educational/healthdisp/role-of-community-health-](https://www.nhlbi.nih.gov/health/educational/healthdisp/role-of-community-health-workers.htm)  
389 [workers.htm](https://www.nhlbi.nih.gov/health/educational/healthdisp/role-of-community-health-workers.htm).
- 390 12. Abdalla M, Bolen SD, Brettler J, Egan BM, Ferdinand KC, Ford CD, et al.  
391 Implementation Strategies to Improve Blood Pressure Control in the United States: A  
392 Scientific Statement From the American Heart Association and American Medical  
393 Association. *Hypertension*. 2023;0(0).
- 394 13. McCurley JL, Fung V, Levy DE, McGovern S, Vogeli C, Clark CR, et al. Assessment of  
395 the Massachusetts Flexible Services Program to Address Food and Housing Insecurity in a  
396 Medicaid Accountable Care Organization. *JAMA Health Forum*. 2023;4(6):e231191.
- 397 14. U.S. Adult Food Security Survey Module: Three-Stage Design, with Screeners.  
398 Economic Research Service USDA; 2012.

- 399 15. Green SH, Glanz K. Development of the Perceived Nutrition Environment Measures  
400 Survey. *Am J Prev Med.* 2015;49(1):50-61.
- 401 16. Spitzer RL, Kroenke K, Williams JB, Löwe B. A brief measure for assessing generalized  
402 anxiety disorder: the GAD-7. *Arch Intern Med.* 2006;166(10):1092-7.
- 403 17. Cohen S, Williamson G, Spacapan S, Oskamp S. The social psychology of health. *The*  
404 *social psychology of health.* 1988.
- 405 18. Kroenke K, Spitzer RL, Williams JB. The PHQ-9: validity of a brief depression severity  
406 measure. *J Gen Intern Med.* 2001;16(9):606-13.
- 407 19. Brantley P, Jones G, Boudreaux E, Catz S. Weekly Stress Inventory. In: Zalaquett CP,  
408 Woods RJ, editors. *Evaluating stress: A book of resources.* Lanham, MD: Scarecrow  
409 Education; 1997. p. 405-20.
- 410 20. 2019 National Health Interview Survey (NHIS) Questionnaire. National Center for  
411 Health Statistics, CDC; 2019.
- 412 21. Sherbourne CD, Stewart AL. The MOS social support survey. *Soc Sci Med.*  
413 1991;32(6):705-14.
- 414 22. Michaels E, Thomas M, Reeves A, Price M, Hasson R, Chae D, et al. Coding the  
415 Everyday Discrimination Scale: implications for exposure assessment and associations with  
416 hypertension and depression among a cross section of mid-life African American women. *J*  
417 *Epidemiol Community Health.* 2019;73(6):577-84.
- 418 23. Disability and Health Data System (DHDS) Data Guide Status and Types: National  
419 Center on Birth Defects and Developmental Disabilities, Centers for Disease Control and  
420 Prevention; [updated May 3, 2023. Available from:  
421 <https://www.cdc.gov/ncbddd/disabilityandhealth/dhds/data-guide/status-and-types.html>.

- 422 24. Craig CL, Marshall AL, Sjöström M, Bauman AE, Booth ML, Ainsworth BE, et al.  
423 International physical activity questionnaire: 12-country reliability and validity. *Med Sci*  
424 *Sports Exerc.* 2003;35(8):1381-95.
- 425 25. Forrest CB, Meltzer LJ, Marcus CL, de la Motte A, Kratchman A, Buysse DJ, et al.  
426 Development and validation of the PROMIS Pediatric Sleep Disturbance and Sleep-Related  
427 Impairment item banks. *Sleep.* 2018;41(6):zsy054.
- 428 26. Sonnenblick R, Reilly A, Roye K, McCurley JL, Levy DE, Fung V, et al. Social  
429 Determinants of Health and Hypertension Control in Adults with Medicaid. *J Prim Care*  
430 *Community Health.* 2022;13:21501319221142426.
- 431 27. Subar AF, Kirkpatrick SI, Mittl B, Zimmerman TP, Thompson FE, Bingley C, et al. The  
432 Automated Self-Administered 24-hour dietary recall (ASA24): a resource for researchers,  
433 clinicians, and educators from the National Cancer Institute. *J Acad Nutr Diet.*  
434 2012;112(8):1134-7.
- 435 28. Kirkpatrick SI, Subar AF, Douglass D, Zimmerman TP, Thompson FE, Kahle LL, et al.  
436 Performance of the Automated Self-Administered 24-hour Recall relative to a measure of  
437 true intakes and to an interviewer-administered 24-h recall. *Am J Clin Nutr.*  
438 2014;100(1):233-40.
- 439 29. Reedy J, Lerman JL, Krebs-Smith SM, Kirkpatrick SI, Pannucci TE, Wilson MM, et al.  
440 Evaluation of the Healthy Eating Index-2015. *J Acad Nutr Diet.* 2018;118(9):1622-33.
- 441 30. Shams-White MM, Pannucci TE, Lerman JL, Herrick KA, Zimmer M, Meyers Mathieu  
442 K, et al. Healthy Eating Index-2020: Review and Update Process to Reflect the Dietary  
443 Guidelines for Americans, 2020-2025. *Journal of the Academy of Nutrition and Dietetics.*



- 444 31. Kirkpatrick SI, Reedy J, Krebs-Smith SM, Pannucci TE, Subar AF, Wilson MM, et al.  
445 Applications of the Healthy Eating Index for Surveillance, Epidemiology, and Intervention  
446 Research: Considerations and Caveats. *J Acad Nutr Diet*. 2018;118(9):1603-21.
- 447 32. Luo H, Dodd KW, Arnold CD, Engle-Stone R. Introduction to the SIMPLE Macro, a  
448 Tool to Increase the Accessibility of 24-Hour Dietary Recall Analysis and Modeling. *J Nutr*.  
449 2021;151(5):1329-40.
- 450 33. Whelton PK, Appel LJ, Sacco RL, Anderson CA, Antman EM, Campbell N, et al.  
451 Sodium, blood pressure, and cardiovascular disease: further evidence supporting the  
452 American Heart Association sodium reduction recommendations. *Circulation*.  
453 2012;126(24):2880-9.
- 454 34. National Academies of Sciences Engineering and Medicine. Dietary Reference Intakes  
455 for Sodium and Potassium. Washington DC: National Academies Press; 2019.
- 456 35. Friedman JH, Hastie T, Tibshirani R. Regularization Paths for Generalized Linear  
457 Models via Coordinate Descent. *Journal of Statistical Software*. 2010;33(1):1 - 22.
- 458 36. U.S. Department of Health and Human Services and U.S. Department of Agriculture.  
459 2020–2025 Dietary Guidelines for Americans. 9th ed December 2020.
- 460 37. Average Healthy Eating Index-2015 Scores for All Americans by Age Groups. What We  
461 Eat in America, NHANES 2017-2018. U.S. Department of Agriculture, Food and Nutrition  
462 Service, Center for Nutrition Policy and Promotion; 2022.
- 463 38. D'Elia L, Barba G, Cappuccio FP, Strazzullo P. Potassium intake, stroke, and  
464 cardiovascular disease a meta-analysis of prospective studies. *J Am Coll Cardiol*.  
465 2011;57(10):1210-9.

- 466 39. Gardner CD, Vadiveloo MK, Petersen KS, Anderson CAM, Springfield S, Van Horn L,  
467 et al. Popular Dietary Patterns: Alignment With American Heart Association 2021 Dietary  
468 Guidance: A Scientific Statement From the American Heart Association. *Circulation*. 2023.
- 469 40. Wang P, Song M, Eliassen AH, Wang M, Fung TT, Clinton SK, et al. Optimal dietary  
470 patterns for prevention of chronic disease. *Nature Medicine*. 2023;29(3):719-28.
- 471 41. Wilson MM, Reedy J, Krebs-Smith SM. American Diet Quality: Where It Is, Where It Is  
472 Heading, and What It Could Be. *J Acad Nutr Diet*. 2016;116(2):302-10.e1.
- 473 42. Pasha M, Brewer LC, Sennhauser S, Alsawas M, Murad MH. Health Care Delivery  
474 Interventions for Hypertension Management in Underserved Populations in the United  
475 States: A Systematic Review. *Hypertension*. 2021;78(4):955-65.
- 476 43. Gu KD, Faulkner KC, Thorndike AN. Housing instability and cardiometabolic health in  
477 the United States: a narrative review of the literature. *BMC Public Health*. 2023;23(1):931.
- 478 44. Hill-Briggs F, Adler NE, Berkowitz SA, Chin MH, Gary-Webb TL, Navas-Acien A, et  
479 al. Social Determinants of Health and Diabetes: A Scientific Review. *Diabetes Care*. 2020.
- 480 45. MacLean RR, Cowan A, Vernarelli JA. More to gain: dietary energy density is related to  
481 smoking status in US adults. *BMC Public Health*. 2018;18(1):365.
- 482 46. Liu S, Jiang H, Zhang D, Luo J, Zhang H. The Association between Smoking Cessation  
483 and Depressive Symptoms: Diet Quality Plays a Mediating Role. *Nutrients*. 2022;14(15).
- 484 47. Kimokoti RW, Newby PK, Gona P, Zhu L, Jasuja GK, Pencina MJ, et al. Diet quality,  
485 physical activity, smoking status, and weight fluctuation are associated with weight change in  
486 women and men. *J Nutr*. 2010;140(7):1287-93.

- 487 48. Gelfand AR, Tangney CC. Dietary quality differs among cannabis use groups: data from  
488 the National Health and Nutrition Examination Survey 2005-16. *Public Health Nutr.*  
489 2021;24(11):3419-27.
- 490 49. Zeballos E, Todd JE. The effects of skipping a meal on daily energy intake and diet  
491 quality. *Public Health Nutr.* 2020;23(18):3346-55.
- 492 50. Kupis J, Johnson S, Hallihan G, Olstad DL. Assessing the Usability of the Automated  
493 Self-Administered Dietary Assessment Tool (ASA24) among Low-Income Adults. *Nutrients.*  
494 2019;11(1).
- 495

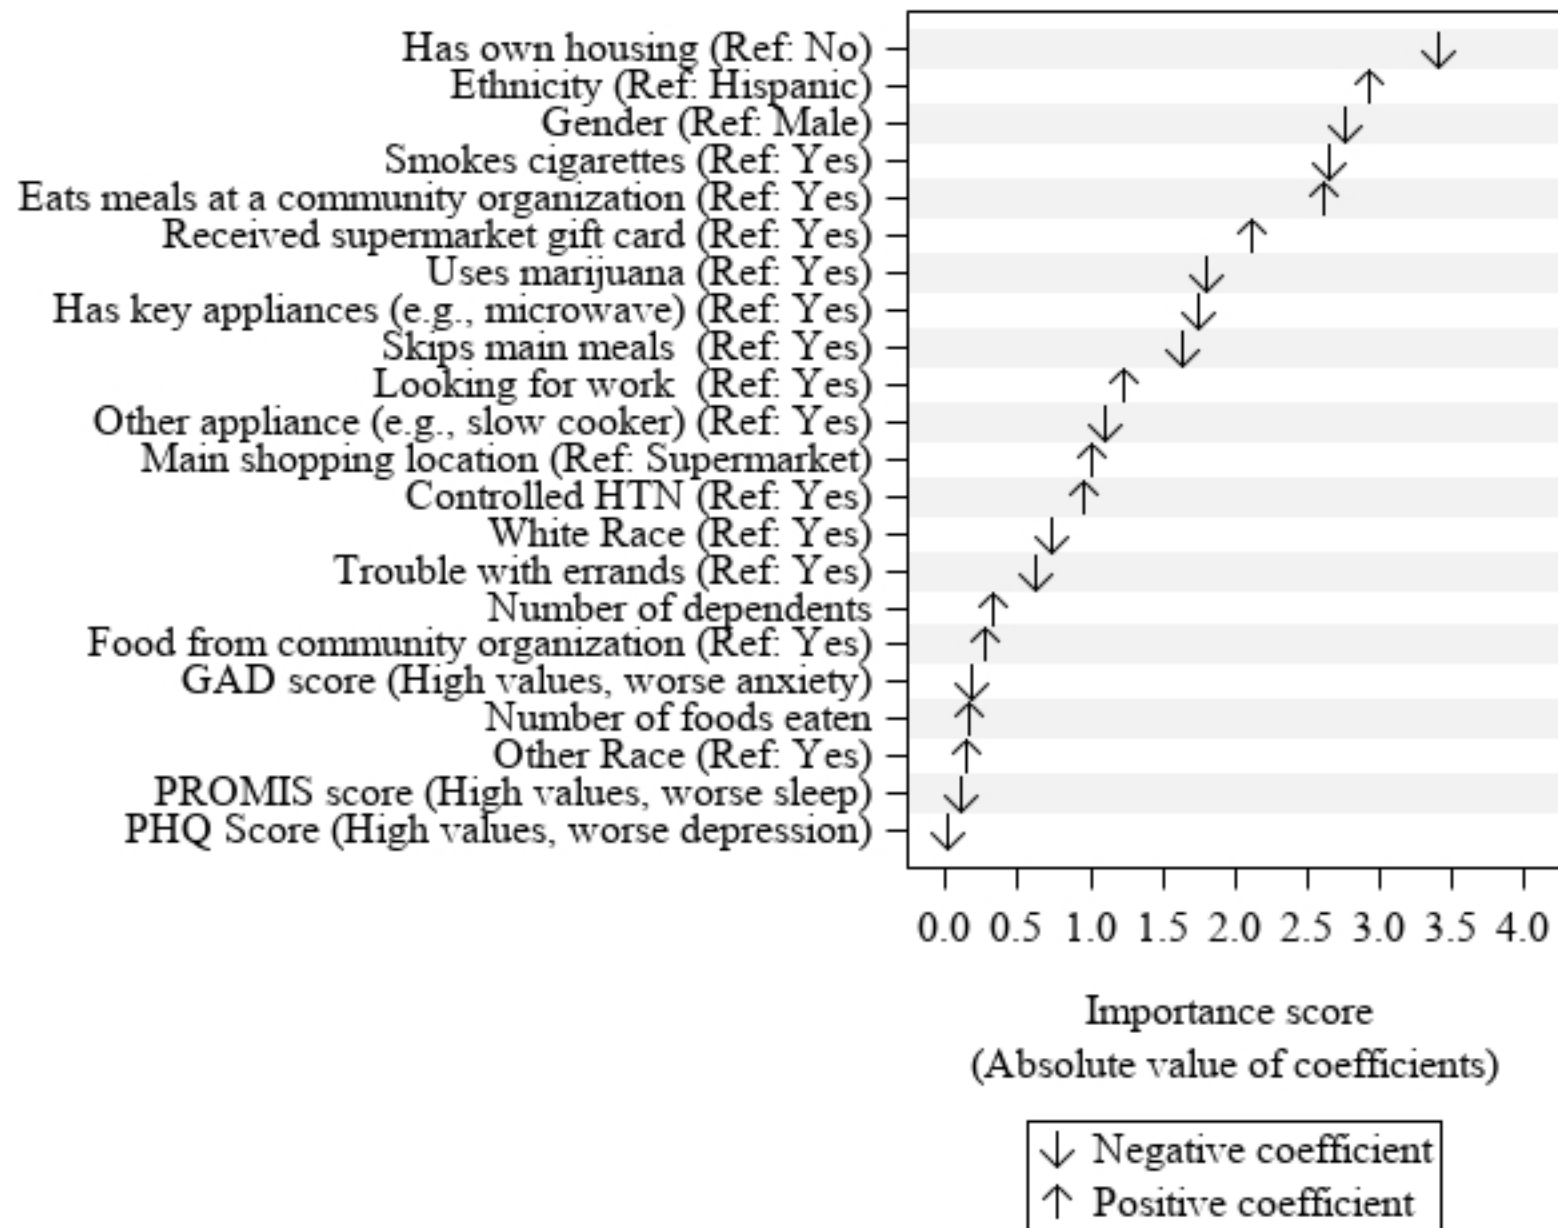

Figure 1
